# Supplementary material
Source: PubMed Central journal article supplement (PMC3244937)
Supplement: NIHMS342082-supplement-Supplemental_Data.pdf [file NIHMS342082-supplement-Supplemental_Data.pdf]

**Supplemental Table 1** Compound names, chemical structures, maximum excitation and emission wavelengths, and the percent change in fluorescence values (%FQ) of the indole library collection.

| #  | compound name                            | Ex  | Em  | chemical structure                                                                   | % FQ pre-fibrils | % FQ fibrils | pre-fibrillar selectivity |
|----|------------------------------------------|-----|-----|--------------------------------------------------------------------------------------|------------------|--------------|---------------------------|
|    | indole                                   | 280 | 350 | 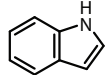    | 9.7              | 1.5          | 6.3                       |
| 1  | 5-benzyloxyindole                        | 270 | 330 |    | 16.0             | 2.5          | 6.4                       |
| 2  | N-acetyl-L-tryptophan                    | 280 | 360 |    | 11.6             | 2.7          | 4.3                       |
| 3  | N-acetyl-DL-tryptophan                   | 280 | 360 |    | 11.5             | 0.9          | 13.3                      |
| 4  | 5-methoxyindole                          | 280 | 335 |     | 11.7             | 2.6          | 4.5                       |
| 5  | 1-methyl-2-phenylindole                  | 280 | 375 |   | 18.1             | 15.7         | 1.2                       |
| 6  | 7-azaindole                              | 280 | 390 |   | 11.5             | 1.0          | 11.6                      |
| 7  | 5-bromoindole                            | 265 | 340 |   | 17.0             | 5.7          | 3.0                       |
| 8  | 2-phenylindole                           | 310 | 375 |  | 13.3             | 3.2          | 4.2                       |
| 9  | tryptophol<br>(2-(1H-indol-3-yl)ethanol) | 280 | 365 |  | 11.1             | 3.7          | 3.0                       |
| 10 | 3-methylindole                           | 280 | 370 |   | 13.7             | 5.0          | 2.7                       |
| 11 | L-tryptophan methyl ester                | 280 | 355 |   | 3.0              | 1.6          | 1.9                       |
| 12 | indole-5-carboxylic acid                 | 280 | 390 |   | 24.5             | 3.2          | 7.6                       |

| #  | compound name                                                 | Ex  | Em  | chemical structure                                                                   | % FQ pre-fibrils | % FQ fibrils | pre-fibrillar selectivity |
|----|---------------------------------------------------------------|-----|-----|--------------------------------------------------------------------------------------|------------------|--------------|---------------------------|
| 13 | D-tryptophan<br>((R)-2-amino-3-(1H-indol-3-yl)propanoic acid) | 280 | 360 | 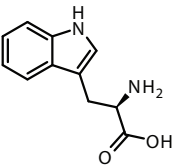   | 9.9              | 1.4          | 7.3                       |
| 14 | 5-hydroxyindole                                               | 280 | 335 |     | 8.1              | 1.7          | 4.8                       |
| 15 | indene                                                        | 280 | 370 |     | 13.5             | 2.7          | 5.0                       |
| 16 | N-(3-indolylacetyl)-DL-aspartic acid                          | 280 | 360 |    | 11.4             | 2.4          | 4.8                       |
| 17 | 2-(2-aminophenyl)indole                                       | 290 | 415 |    | 14.2             | 2.7          | 5.3                       |
| 18 | indole-3-acetamide                                            | 280 | 355 |    | 9.2              | 0.5          | 18.3                      |
| 19 | 1-methylindole                                                | 280 | 350 |    | 11.7             | 1.2          | 9.7                       |
| 20 | 5-methoxy-DL-tryptophan                                       | 280 | 340 |  | 9.0              | 1.4          | 6.6                       |
| 21 | indole-3-butyric acid                                         | 280 | 370 |  | 13.4             | 2.2          | 6.1                       |
| 22 | L-tryptophanol<br>((S)-2-amino-3-(1H-indol-3-yl)propan-1-ol)  | 280 | 355 |  | 23.8             | 1.4          | 17.6                      |
| 23 | 5-hydroxy-L-tryptophan                                        | 280 | 340 |  | 2.4              | 1.8          | 1.3                       |
| 24 | DL-3-indolelactic acid                                        | 280 | 365 |   | 18.7             | 2.2          | 8.4                       |
| 25 | indole-3-carbinol                                             | 280 | 360 |  | 17.4             | 3.3          | 5.3                       |
| 26 | 3-indole-propionic acid                                       | 280 | 365 |  | 16.6             | 2.8          | 6.0                       |

| #  | compound name                                                          | Ex  | Em  | chemical structure                                                                   | % FQ pre-fibrils | % FQ fibrils | pre-fibrillar selectivity |
|----|------------------------------------------------------------------------|-----|-----|--------------------------------------------------------------------------------------|------------------|--------------|---------------------------|
| 27 | indole-3-pyruvic acid                                                  | 275 | 355 | 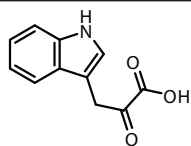    | 13.3             | 3.2          | 4.1                       |
| 28 | serotonin<br>(3-(2-aminoethyl)-1H-indol-5-ol)                          | 280 | 335 |     | 14.5             | 3.4          | 4.2                       |
| 29 | tryptamine<br>(2-(1H-indol-3-yl)ethan-amine)                           | 280 | 360 |     | 13.4             | 2.8          | 4.9                       |
| 30 | L-tryptophan<br>( <i>(S)</i> -2-amino-3-(1H-indol-3-yl)propanoic acid) | 280 | 360 |     | 14.9             | 2.9          | 5.2                       |
| 31 | 5-methyl-DL-tryptophan                                                 | 280 | 350 |     | 3.1              | 3.3          | 1.0                       |
| 32 | 5-fluoro-DL-tryptophan                                                 | 270 | 330 |    | 14.7             | 3.0          | 4.9                       |
| 33 | melatonin<br>( <i>N</i> -(2-(5-methoxy-1H-indol-3-yl)ethyl)acetamide)  | 280 | 355 |   | 2.6              | 0.6          | 4.6                       |
| 34 | <i>N</i> - $\alpha$ -Fmoc-L-tryptophan                                 | 280 | 355 |  | 10.0             | 1.5          | 6.7                       |
| 35 | <i>N</i> - $\alpha$ -Fmoc-N-in-Boc-L-tryptophan                        | 270 | 315 |  | 3.6              | 1.7          | 2.1                       |
| 36 | indole-3-carboxaldehyde                                                | 270 | 325 |   | 14.4             | 3.0          | 4.7                       |
| 37 | 5-methylindole-2-carboxylic acid                                       | 280 | 350 |   | 8.4              | 3.1          | 2.7                       |

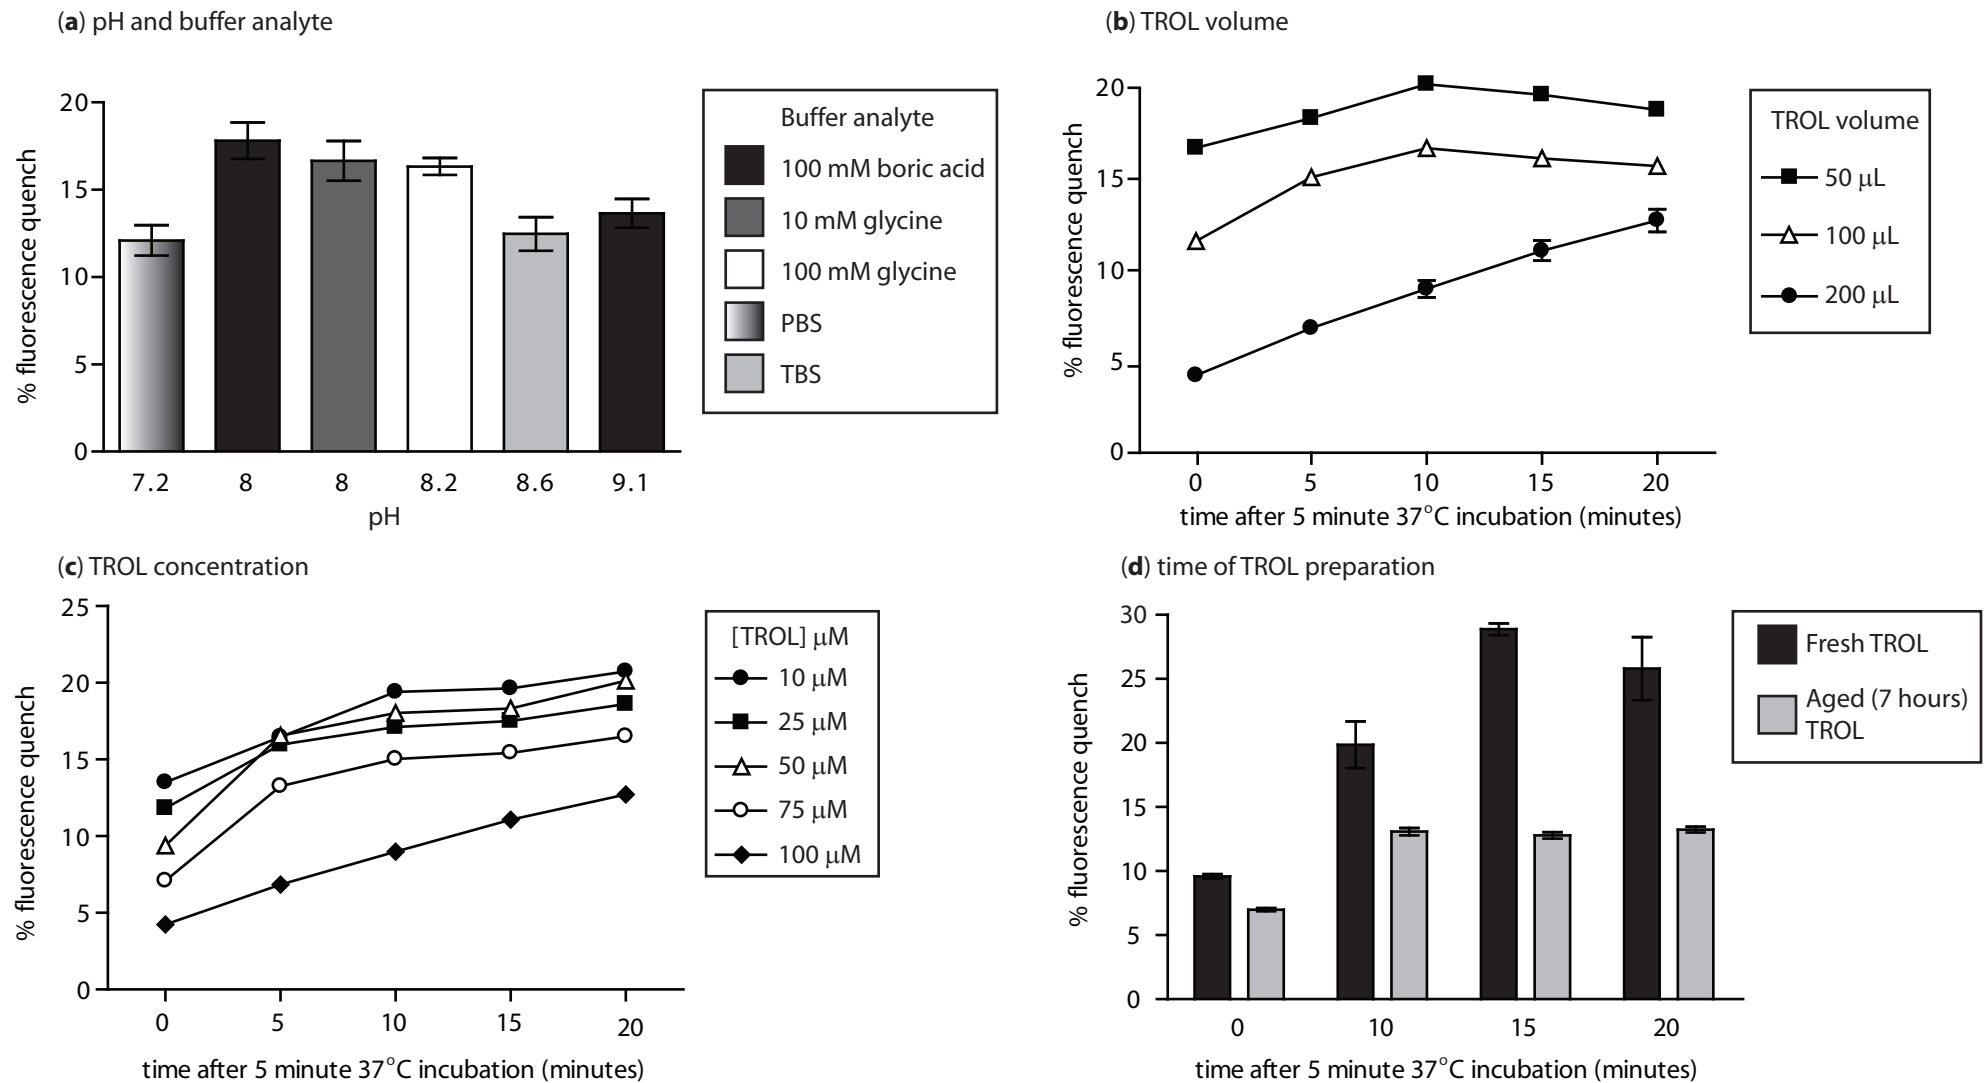

**Supplemental Figure 1 Optimizing pH, volume, concentration, and time of preparation of the TROL reagent** (a) 100 μM TROL was prepared in a variety of buffers at pH values ranging from 7.2-9.1, and 150 μL was added to Aβ pre-fibrils. Samples were incubated for 12 minutes at 37°C followed by 30 minutes at room temperature, after which the fluorescence was recorded relative to TROL alone. The optimized pH range lies between 8-8.2. Although 100 mM boric acid (pH 8) displayed a high signal, we chose a glycine based buffer at pH 8.2 because it is the most commonly accepted buffer for the ThT assay. (b) 50, 100, or 200 μL (80 μM) of TROL was added to pre-fibrils. The fluorescence was recorded at 0, 5, 10, 15, and 20 minutes following incubated at 37°C (five minutes). The amount of TROL impacted both the signal and equilibration time. Lower amounts of TROL (100 μL or less) displayed faster signal equilibration as well as optimal reactivity. (c) TROL concentration was varied from 10 - 100 μM and the assay was developed as described in (b). Similar to TROL volume, high concentrations (100 μM) displayed lower signal and slower equilibration. Alternatively, at 10 μM, the signal was highest and remained unchanged after approximately 10 minutes. (d) To test the impact of the time of TROL preparation on signal, we compared freshly prepared and aged (7 hours) TROL samples. The preparations equilibrated similarly, but aged TROL displayed a >50% lower signal, suggesting TROL should be prepared immediately prior to the start of an experiment for optimal reactivity. For each experiment, 10 μL of 25 μM Aβ (1-42) pre-fibrils were used, all samples were plated in triplicate, and error bars represent the standard deviation. With the exception of (A), 50 mM glycine (pH 8.2) was used for all experiments. Unless otherwise noted, the assay was developed using the protocol in Table 1.

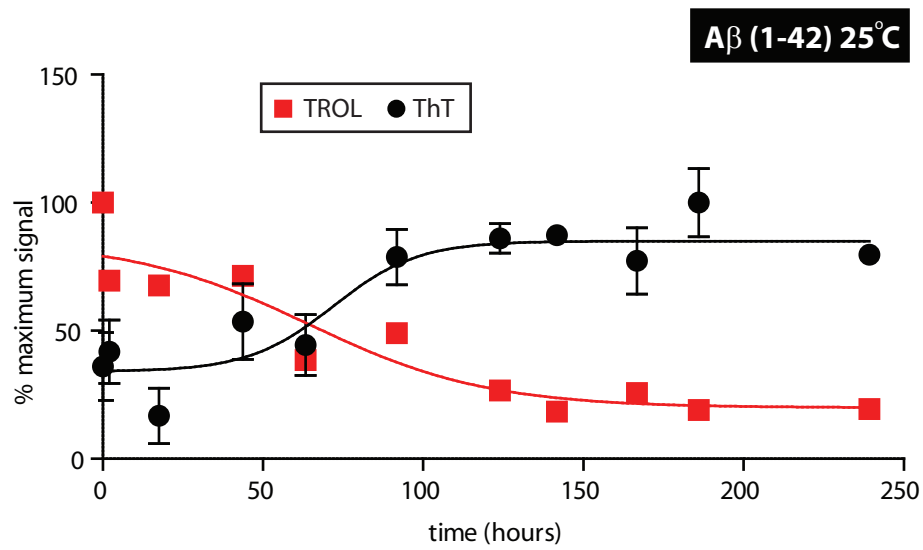

**Supplemental Figure 2 Monitoring the disappearance of A $\beta$  (1-42) pre-fibrils using TROL** A $\beta$  (1-42) was suspended in PBS at 25  $\mu$ M and incubated at room temperature without agitation. The TROL and ThT assays were performed as described in the text and Table 1. The results are representative of three individual experiments performed with A $\beta$  (1-42). Error represents standard deviations.
